# Supplementary material for: Electrochemical sensing of free radical antioxidant diphenylamine cations (DPAH˙+) with carbon interlaced nanoflake-assembled MgxNi9−xS8 microspheres
Source: Royal Society of Chemistry journal article supplement (doi:10.1039/c8ce02004c), 2018-12-11
Supplement: c8ce02004c1.pdf [file c8ce02004c1.pdf]

# Electrochemical Sensing of Free Radical Antioxidant Diphenylamine cation ( $\text{DPAH}^{\cdot+}$ ) with Carbon Interlaced Nanoflake-Assembled $\text{Mg}_x\text{Ni}_{9-x}\text{S}_8$ Microspheres

Raja Nehru,<sup>a,c</sup> Raghavan Chinnambedu Murugesan,<sup>b</sup> Sheng-Ming Chen,<sup>a\*</sup> and Raman Sarkar<sup>c,d\*</sup>

<sup>a</sup>Department of Chemical Engineering and Biotechnology, National Taipei University of Technology, Taipei 10608, Taiwan

<sup>b</sup>Aston Institute of Photonic Technology, Aston university, Birmingham, B4 7ET, UK.

<sup>c</sup>Institute of Physics, Academia Sinica, Taipei 10617, Taiwan

<sup>d</sup>Centre for Condensed Matter Sciences, National Taiwan University, Taipei 10617, Taiwan.

## Corresponding Author

\*E-mail: [smchen78@ms15.hinet.net](mailto:smchen78@ms15.hinet.net), [sankarndf@gmail.com](mailto:sankarndf@gmail.com).

## Supporting information

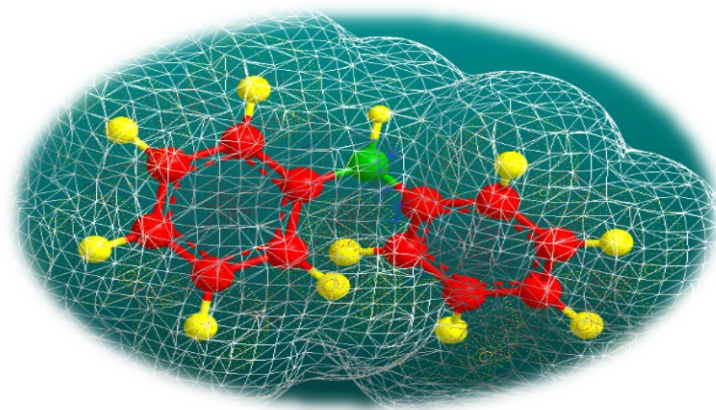

**Fig.S1** The 3D structural view of diphenylamine (DPA).

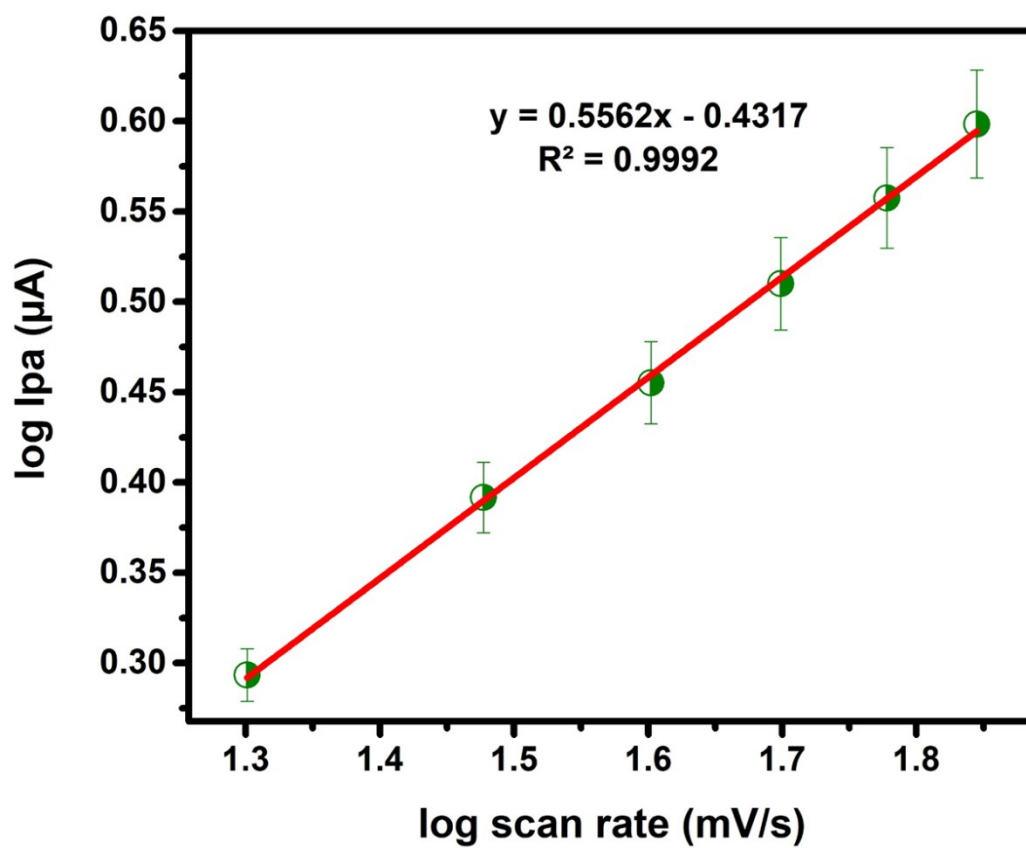

**Fig.S2** Linear relation between log Ipa (μA) vs. log scan rate (mV/s).

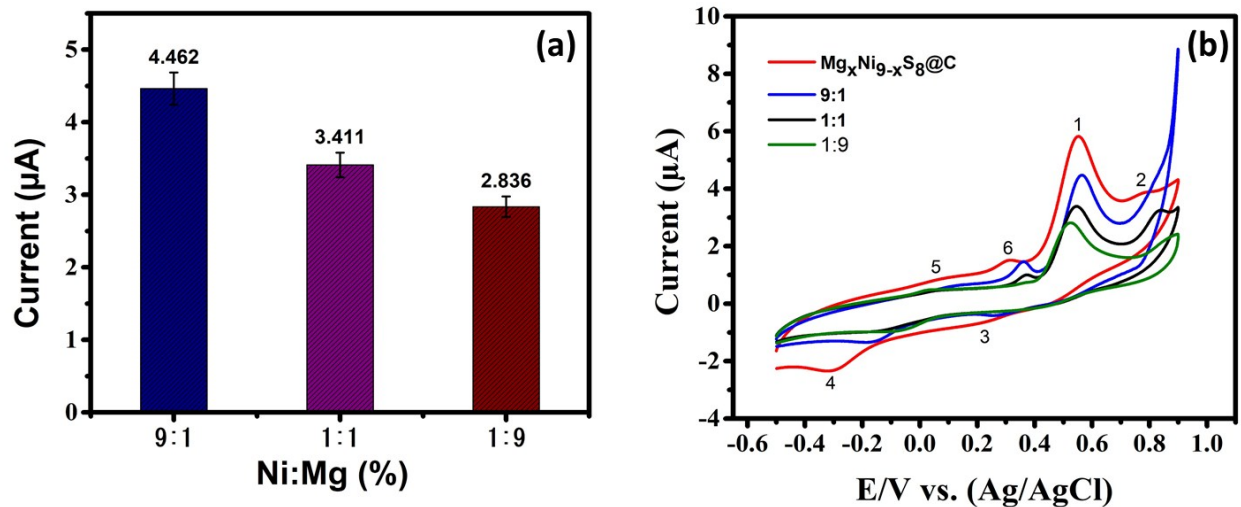

**Fig.S3** (a). Different molar ratio comparison of Ni and Mg in the presence of  $100\mu\text{M}$  of DPA at the scan rate of  $50\text{mV/s}$ . (b). Comparison of  $\text{Mg}_x\text{Ni}_{9-x}\text{S}_8$  and  $\text{Mg}_x\text{Ni}_{9-x}\text{S}_8@\text{C}$  with different ratio of Ni and Mg in the presence of  $100\mu\text{M}$  of DPA at the scan rate of  $50\text{mV/s}$ .

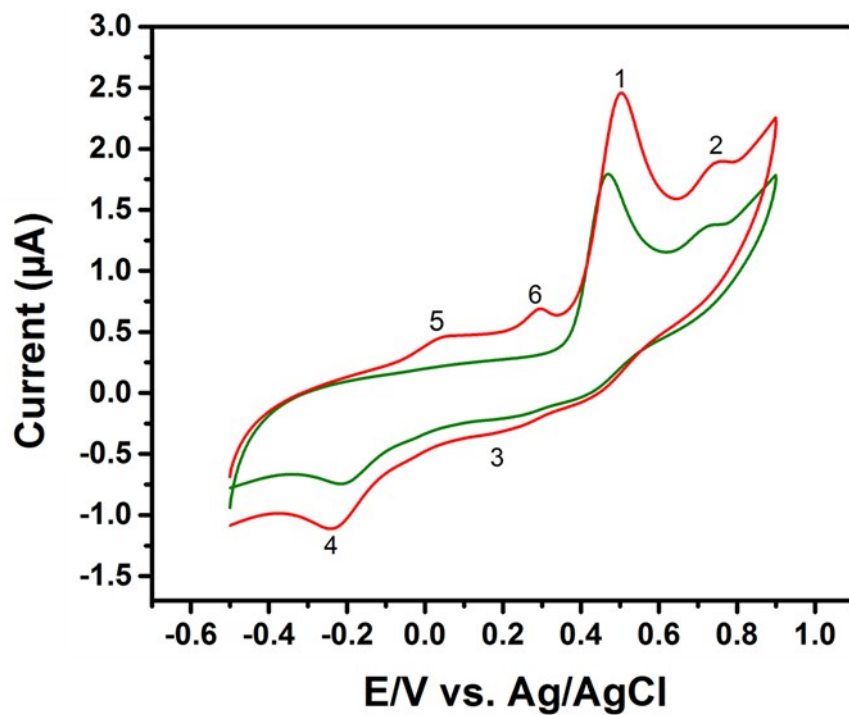

**Fig.S4**. The CV of  $\text{Mg}_x\text{Ni}_{9-x}\text{S}_8@\text{C}$  in the presence of DPA at the scan rate of  $30\text{mV/s}$ .

**Table S1** Determination of spiked DPA in fruit extract samples using  $Mg_xNi_{9-x}S_8$  modified electrode

| <b>sample</b>        | <b>Added(<math>\mu</math>M)</b> | <b>Found(<math>\mu</math>M)</b> | <b>Recovery (%)</b> |
|----------------------|---------------------------------|---------------------------------|---------------------|
| Fruit extract (pear) | 0.5                             | 0.48                            | 96                  |
|                      | 0.6                             | 0.59                            | 98.3                |
|                      | 0.7                             | 0.698                           | 99.8                |

\*Standard addition method
